# Supplementary material for: Inhibitors of Helicobacter pylori Protease HtrA Found by ‘Virtual Ligand’ Screening Combat Bacterial Invasion of Epithelia
Source: PubMed Central journal article supplement (PMC3069028; doi:10.1371/journal.pone.0017986), 2011-03-31

**A**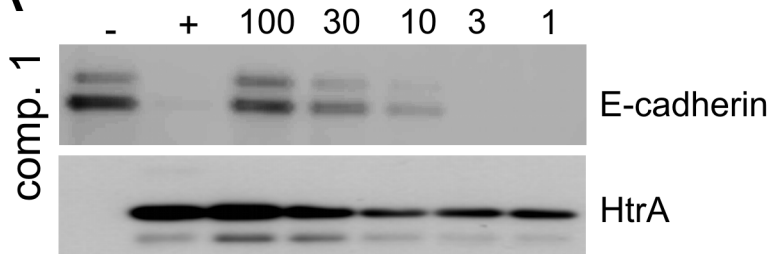**B**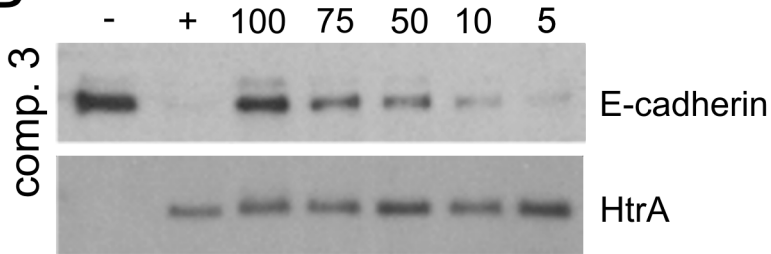

Supplement: pone.0017986.s001.pdf [file pone.0017986.s001.pdf]
