# Supplementary material for: Inhibitors of Helicobacter pylori Protease HtrA Found by ‘Virtual Ligand’ Screening Combat Bacterial Invasion of Epithelia
Source: PubMed Central journal article supplement (PMC3069028; doi:10.1371/journal.pone.0017986), 2011-03-31

A

C:\LabSolutions\Data\Project1\HtrAI8HPLC1.lcd  
 Acquired by : System Administrator  
 Sample Name : HtrAI8HPLC  
 Sample ID :  
 Tray# : 1  
 Vial# : 56  
 Injection Volume : 50  
 Data File : C:\LabSolutions\Data\Project1\HtrAI8HPLC1.lcd  
 Method File : C:\LabSolutions\Data\Project1\HZ142.lcm  
 Report Format File : C:\LabSolutions\System\DEFAULT.lsr  
 Month-Day Acquired : 8/19/2010  
 Month-Day Processed : 8/19/2010

## &lt;Chromatogram&gt;

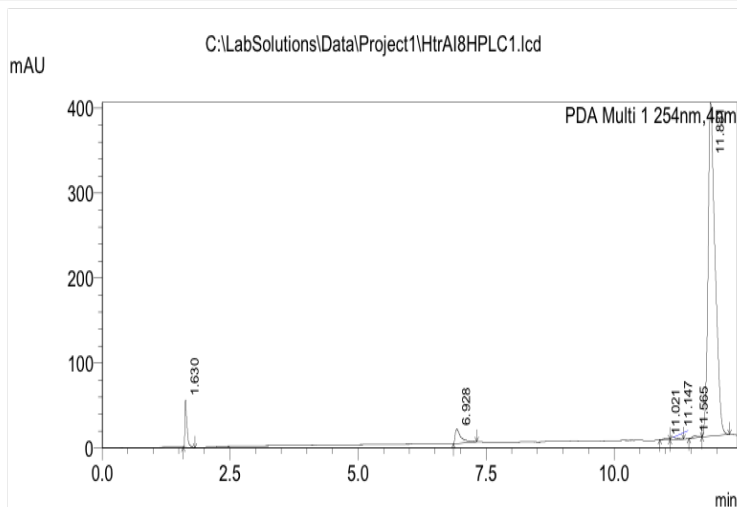

Peak Table

PDA Ch1 254nm

| Peak# | Ret. Time | Area%   | Area    | Height | Name      |
|-------|-----------|---------|---------|--------|-----------|
| 1     | 1.630     | 3.843   | 157754  | 55183  | RT:1.630  |
| 2     | 6.928     | 3.242   | 133085  | 16789  | RT:6.928  |
| 3     | 11.021    | 0.296   | 12140   | 1516   | RT:11.021 |
| 4     | 11.147    | 0.479   | 19661   | 2303   | RT:11.147 |
| 5     | 11.565    | 0.437   | 17942   | 2224   | RT:11.565 |
| 6     | 11.881    | 91.704  | 3764844 | 391185 | RT:11.881 |
| Total |           | 100.000 | 4105426 | 469200 |           |

B

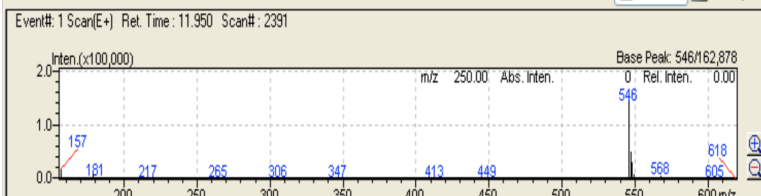

Supplement: pone.0017986.s002.pdf [file pone.0017986.s002.pdf]
