# Supplementary material for: Inhibitors of Helicobacter pylori Protease HtrA Found by ‘Virtual Ligand’ Screening Combat Bacterial Invasion of Epithelia
Source: PubMed Central journal article supplement (PMC3069028; doi:10.1371/journal.pone.0017986), 2011-03-31
Supplement: pone.0017986.s003.pdf [file pone.0017986.s003.pdf]

|                                  |                                               |      |      |      |      |      |
|----------------------------------|-----------------------------------------------|------|------|------|------|------|
| Plate                            | Greiner 384 Flat Bottom Black Polystyrol [GR] |      |      |      |      |      |
| Plate-ID (Stacker)               |                                               |      |      |      |      |      |
| Label: Label2                    |                                               |      |      |      |      |      |
| Mode                             | Fluorescence Top Reading                      |      |      |      |      |      |
| Excitation Wavelength            | 490 nm                                        |      |      |      |      |      |
| Emission Wavelength              | 525 nm                                        |      |      |      |      |      |
| Excitation Bandwidth             | 5 nm                                          |      |      |      |      |      |
| Emission Bandwidth               | 5 nm                                          |      |      |      |      |      |
| Gain                             | 104 Optimal (100%)                            |      |      |      |      |      |
| Number of Flashes                | 50                                            |      |      |      |      |      |
| Flash Frequency                  | 400 Hz                                        |      |      |      |      |      |
| Integration Time                 | 20 µs                                         |      |      |      |      |      |
| Lag Time                         | 0 µs                                          |      |      |      |      |      |
| Settle Time                      | 0 ms                                          |      |      |      |      |      |
| Z-Position (Calculated From: K1) | 23542 µm                                      |      |      |      |      |      |
| Part of Plate                    | K1-N12                                        |      |      |      |      |      |
| Start Time:                      | 24.08.2010 15:43:49                           |      |      |      |      |      |
|                                  | Temperature: 26.6 °C                          |      |      |      |      |      |
|                                  | 8233                                          | 8420 | 7905 | 6786 | 5934 | 5119 |
| HtrA                             | +                                             | +    | +    | +    | +    | +    |
| Hhl                              | -                                             | -    | -    | +    | +    | +    |
| End Time:                        | 24.08.2010 15:44:06                           |      |      |      |      |      |
